# Supplementary material for: 3D metal–organic frameworks constructed of 2D metal aromatic sulfonate–carboxylate layers and 1,3-di(4-pyridyl)propane pillars: syntheses, structural topologies, and luminescent properties
Source: Royal Society of Chemistry journal article supplement (doi:10.1039/c3ce40315g), 2013-01-01
Supplement: c3ce40315g.pdf [file c3ce40315g.pdf]

## Supporting Information

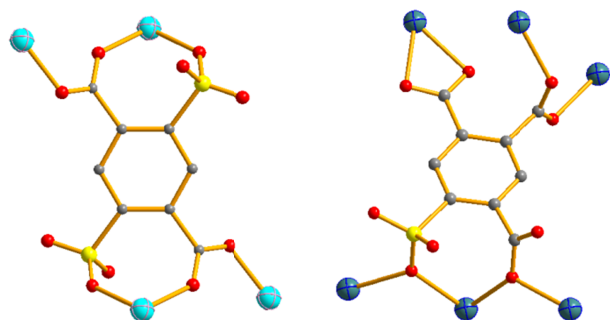

Scheme S1 The observed coordination modes of the DSBDC<sup>4-</sup> and SBTC<sup>4-</sup> ligands in compounds **1** and **2**

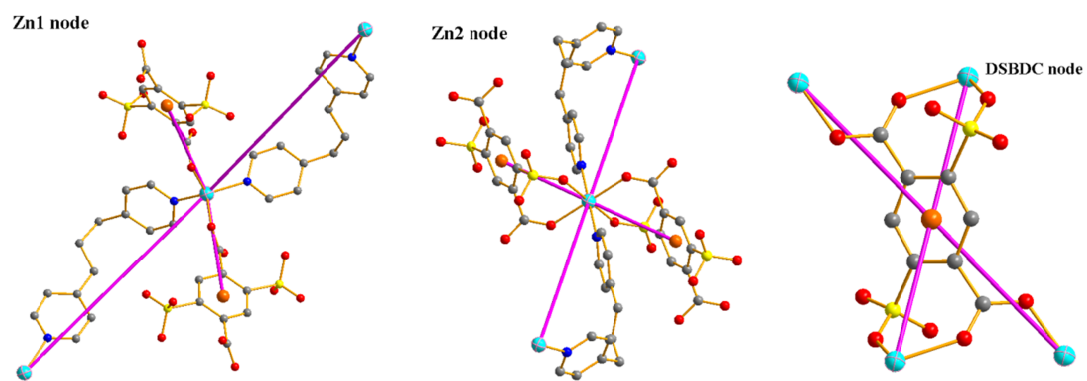

Fig. S1 Schematic view of the three types of 4-connected nodes in **1**

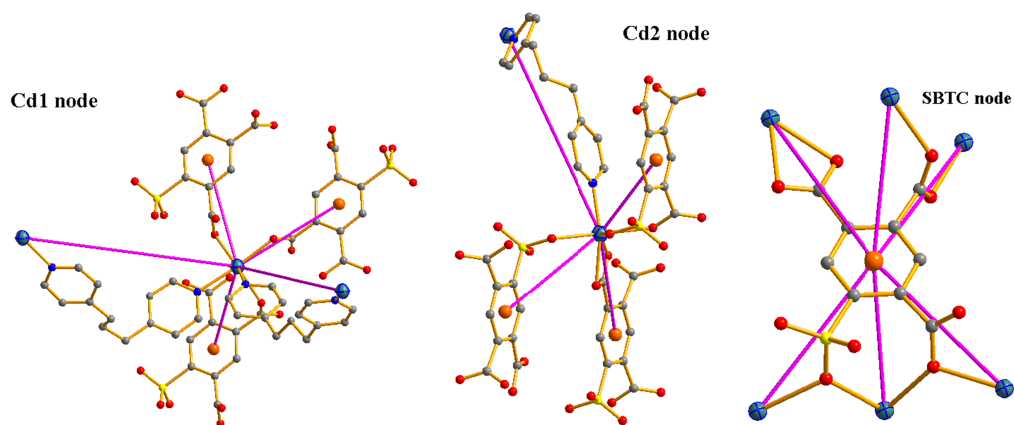

Fig. S2 Schematic view of the (4, 5, 6)-connected nodes in **2**

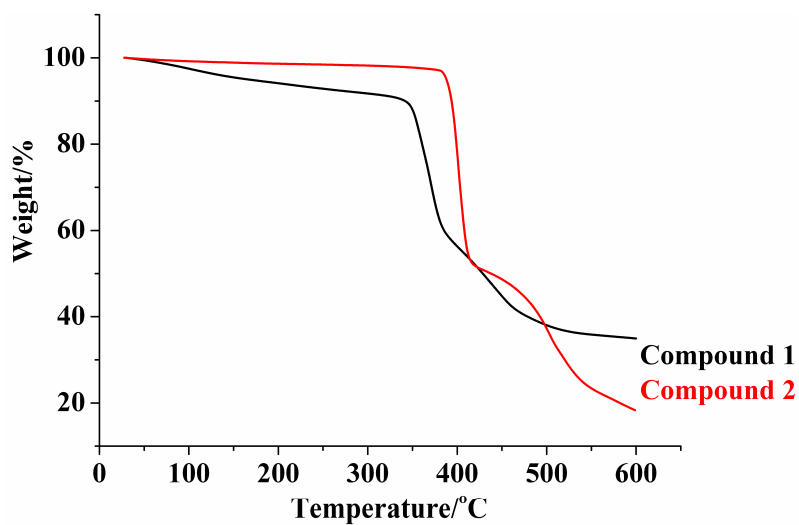

Fig. S3 TGA curves of compounds 1 and 2

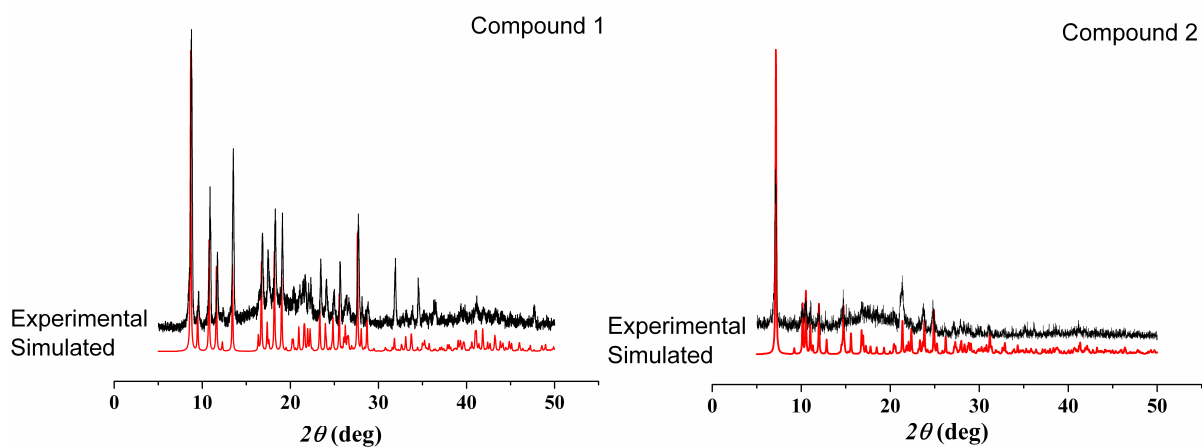

Fig. S4. Powder X-ray diffraction patterns of compounds 1 and 2
